# Supplementary material for: SMAC Mimetics Synergistically Cooperate with HDAC Inhibitors Enhancing TNF-α Autocrine Signaling
Source: MDPI journal article supplement (doi:10.3390/cancers15041315), 2023-02-18
Supplement: s1 [file s1]

## Supplemental Figure 8

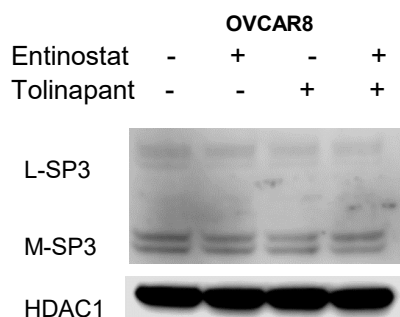

Supplemental Figure 9

HALO™ Spatial Plot

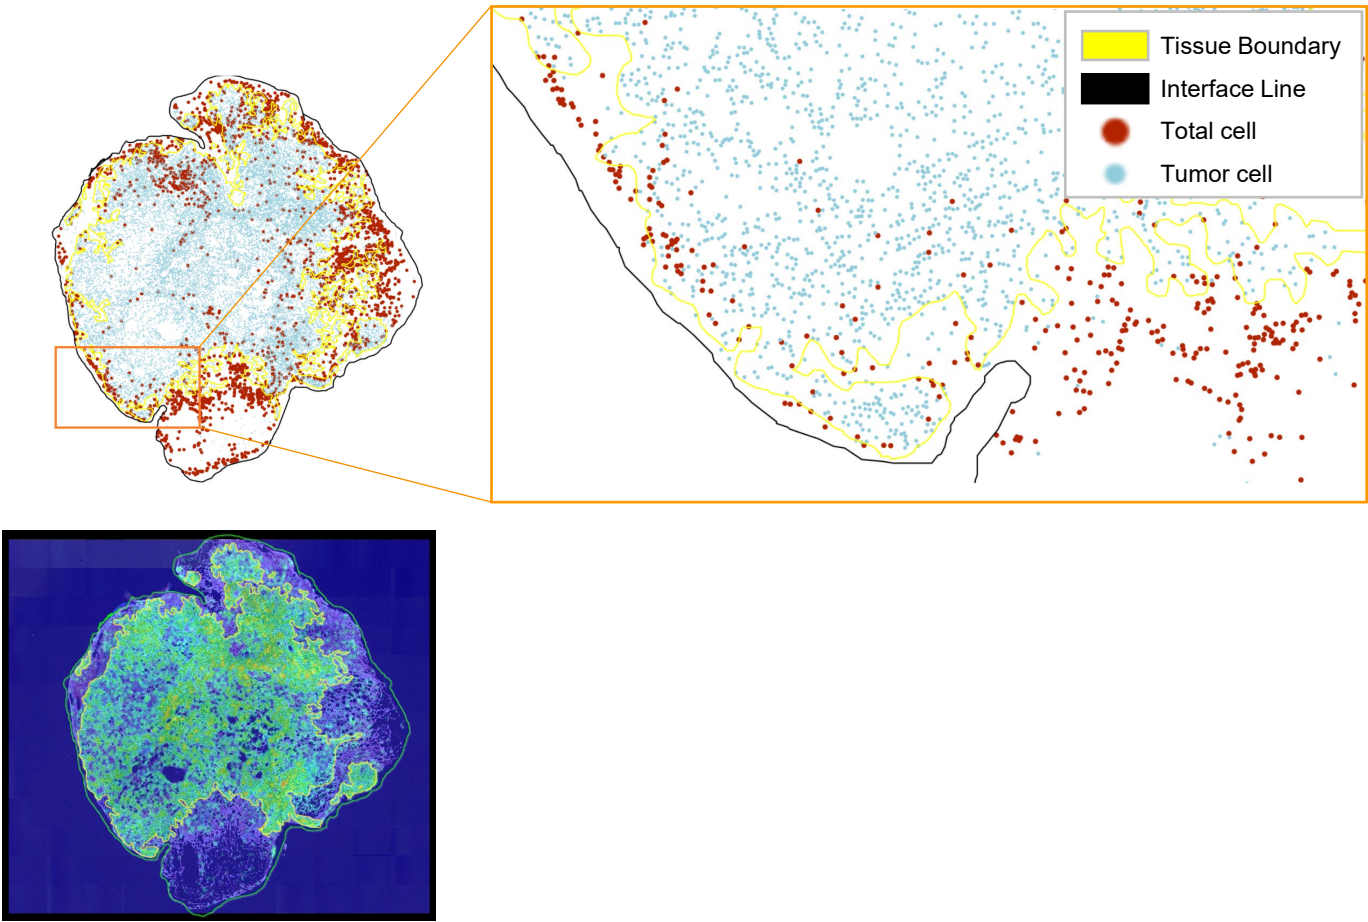

#2

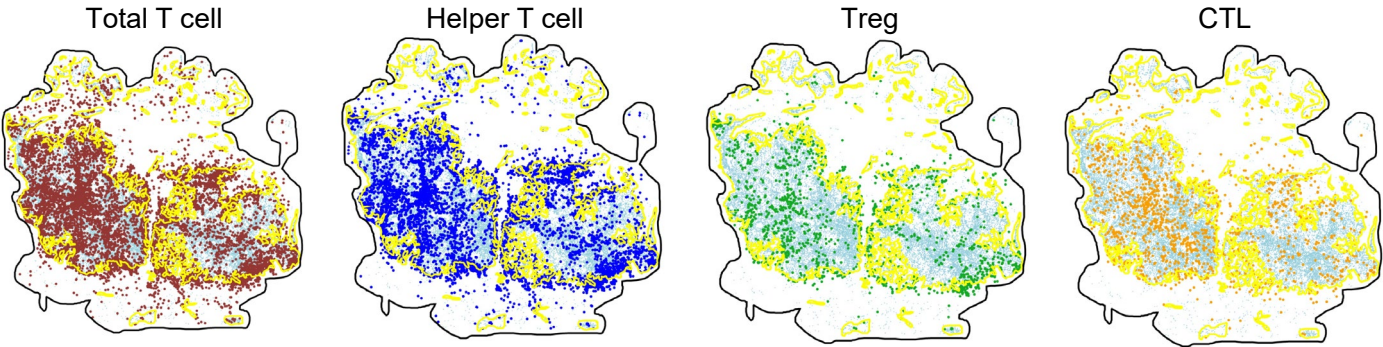

#8

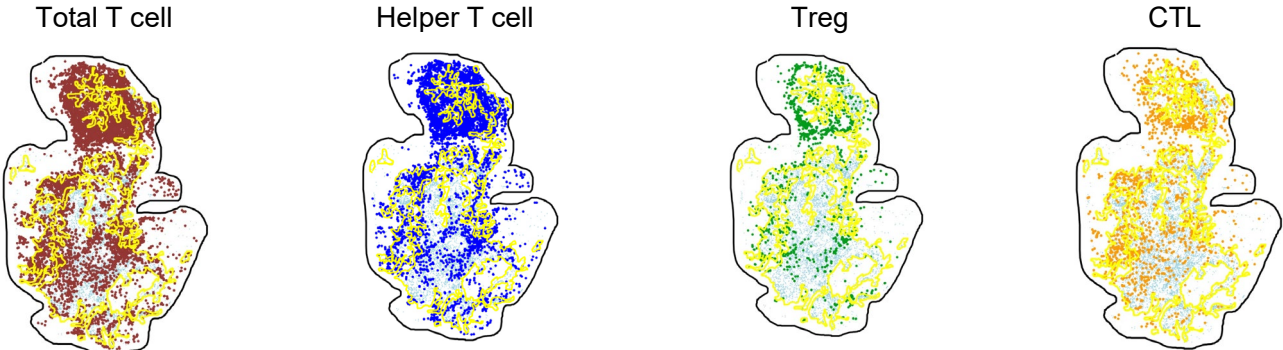

#13

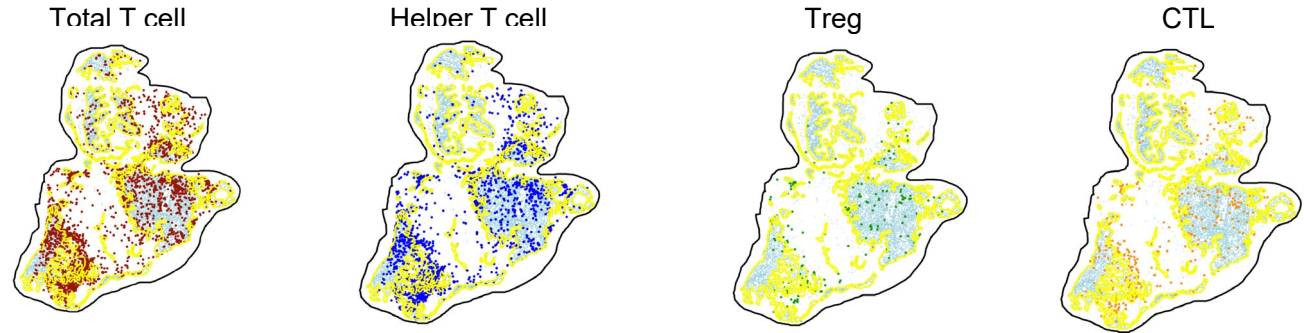

#19

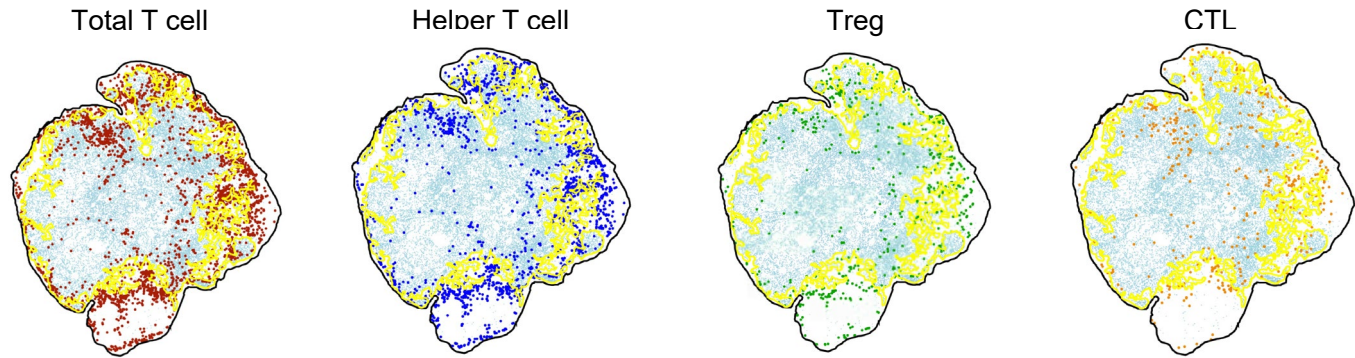

Supplemental Figure 11

|                             |                            |    | Log-rank test | Wilcoxon test |
|-----------------------------|----------------------------|----|---------------|---------------|
|                             |                            |    | p value       | p value       |
| <div></div>                 | Vehicle + IgG              | vs | 0.001         | 0.0011        |
| <div></div>                 | ASTX660 + IgG              |    | 0.001         | 0.0011        |
| <div></div>                 | Entinostat + IgG           |    | 0.0401        | 0.0102        |
| <div></div>                 | ASTX660 + Entinostat + IgG |    | 0.0029        | 0.0071        |
| <div></div>                 | Vehicle + aPD1             |    | <0.001        | 0.001         |
| <div></div>                 | ASTX660 + aPD1             |    | 0.001         | 0.0011        |
| <div></div>                 | Entinostat + aPD1          |    | 0.001         | 0.0011        |
| ASTX660 + Entinostat + aPD1 |                            |    |               |               |
