# Supplementary material for: SMAC Mimetics Synergistically Cooperate with HDAC Inhibitors Enhancing TNF-α Autocrine Signaling
Source: MDPI journal article supplement (doi:10.3390/cancers15041315), 2023-02-18

Supplemental Figure 1

Figure 2A whole blot

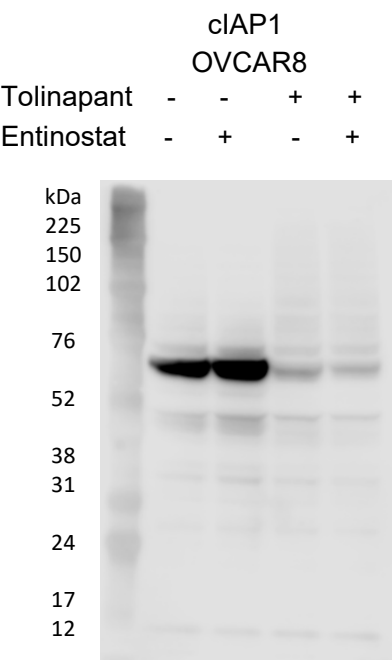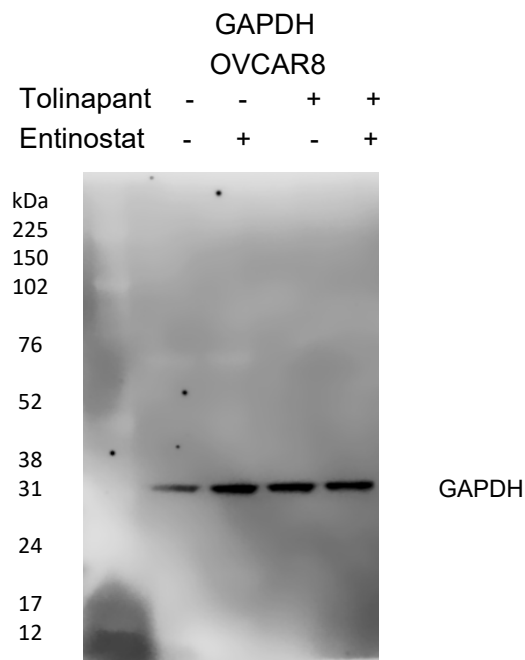

Supplemental Figure 2

Figure 2B whole blot

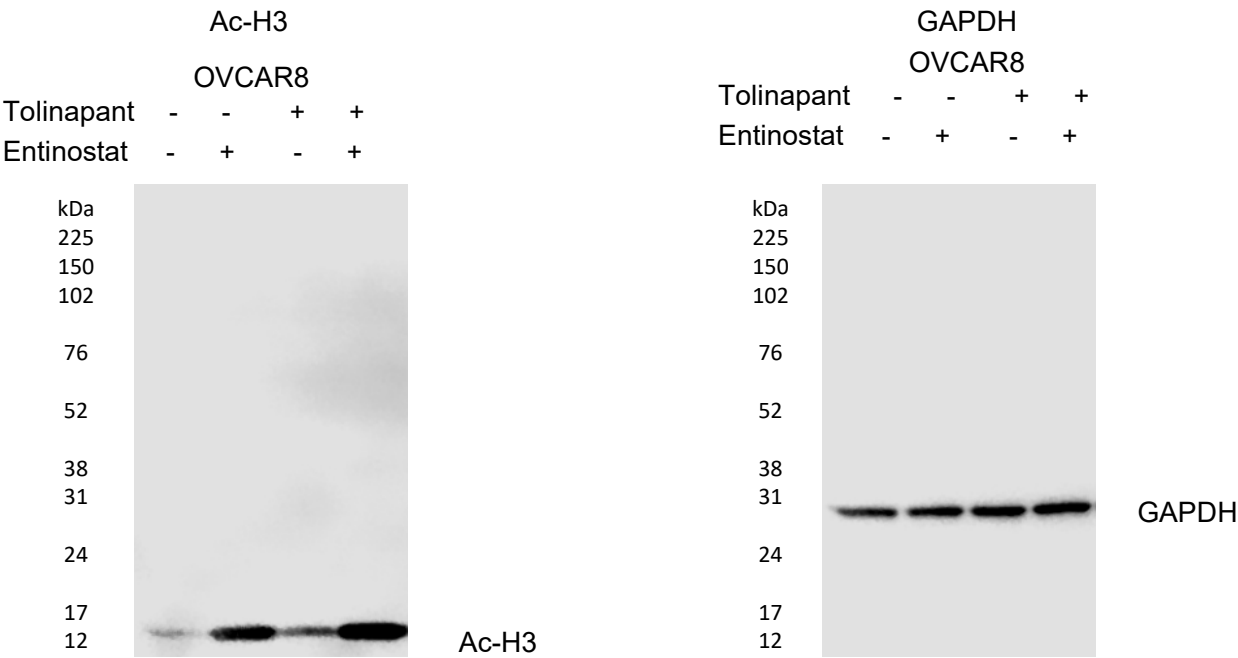

Supplemental Figure 3

Figure 2C WCL  
XIAP whole blot

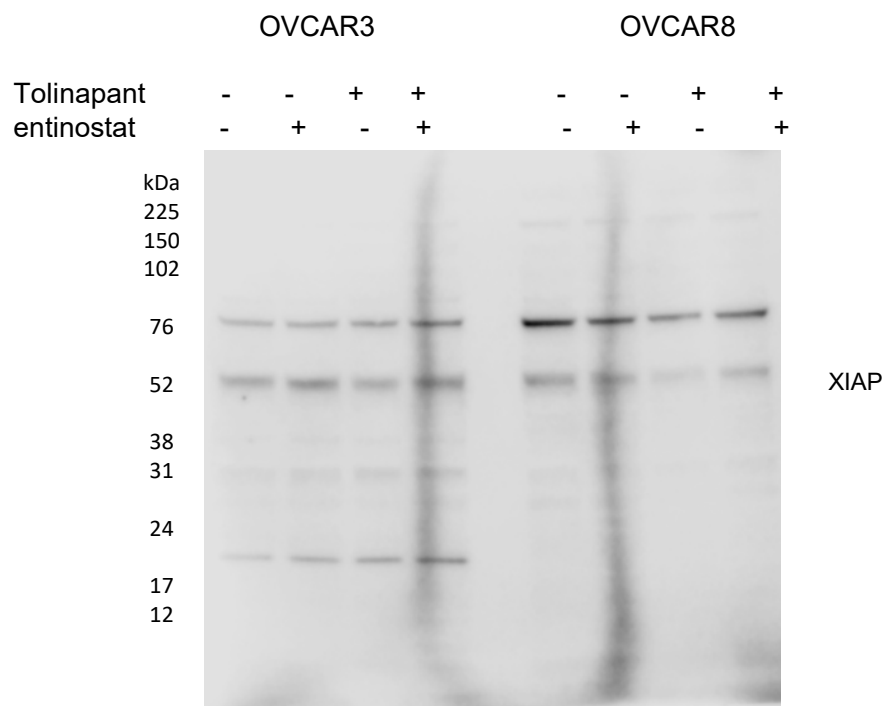

Supplemental Figure 4

Figure 2C WCL  
SMAC whole blot

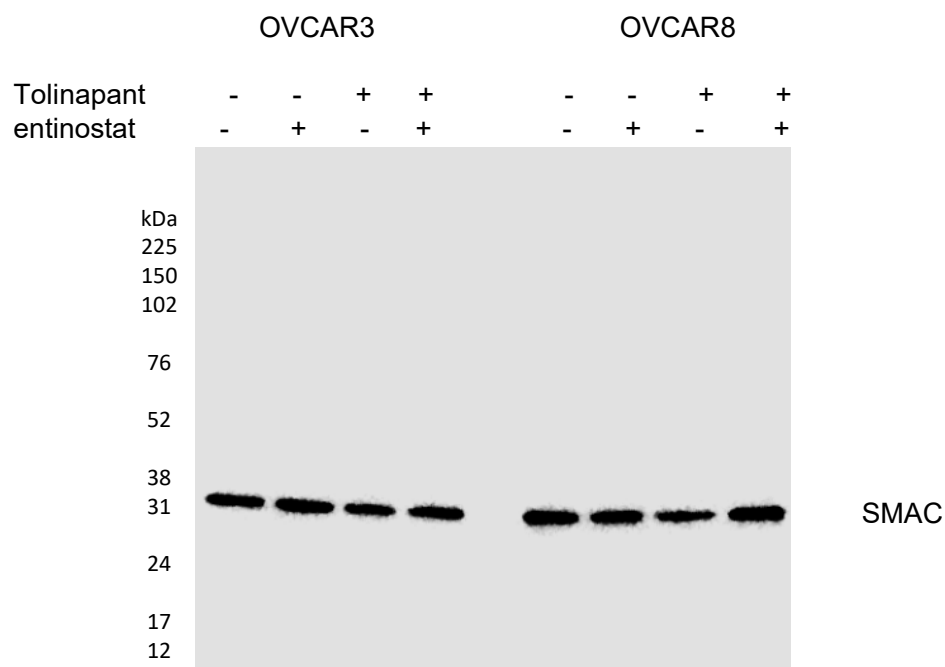

Supplemental Figure 5

Figure 2C WCL  
GAPDH whole blot

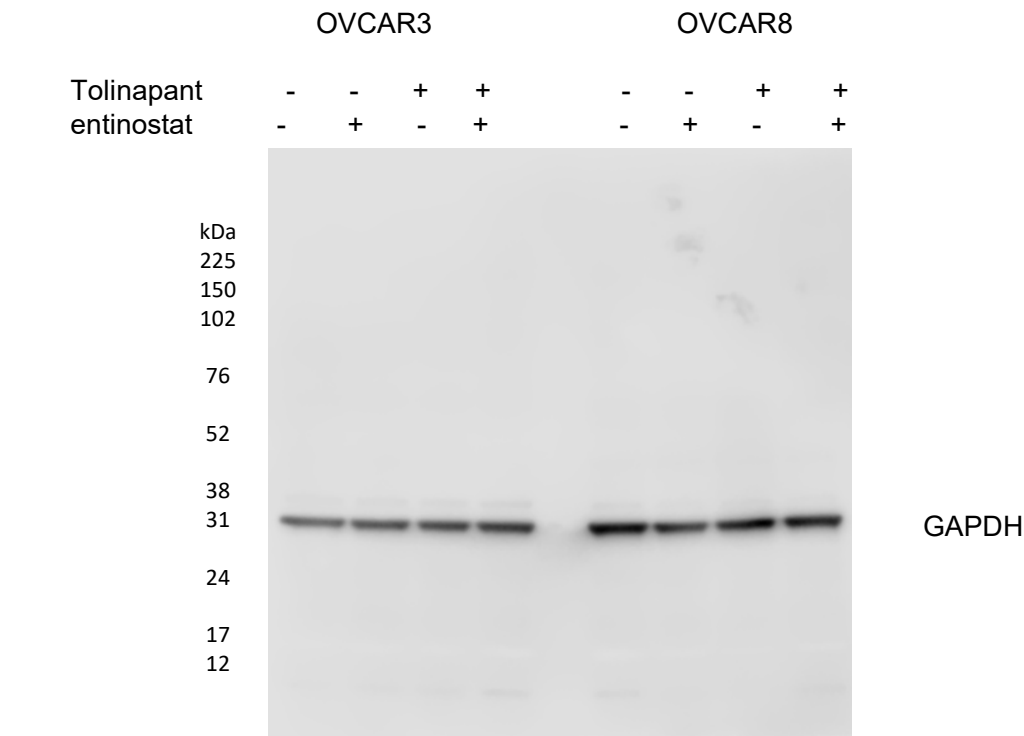

Supplemental Figure 6

Figure 2C IP-XIAP  
XIAP, SMAC whole blot

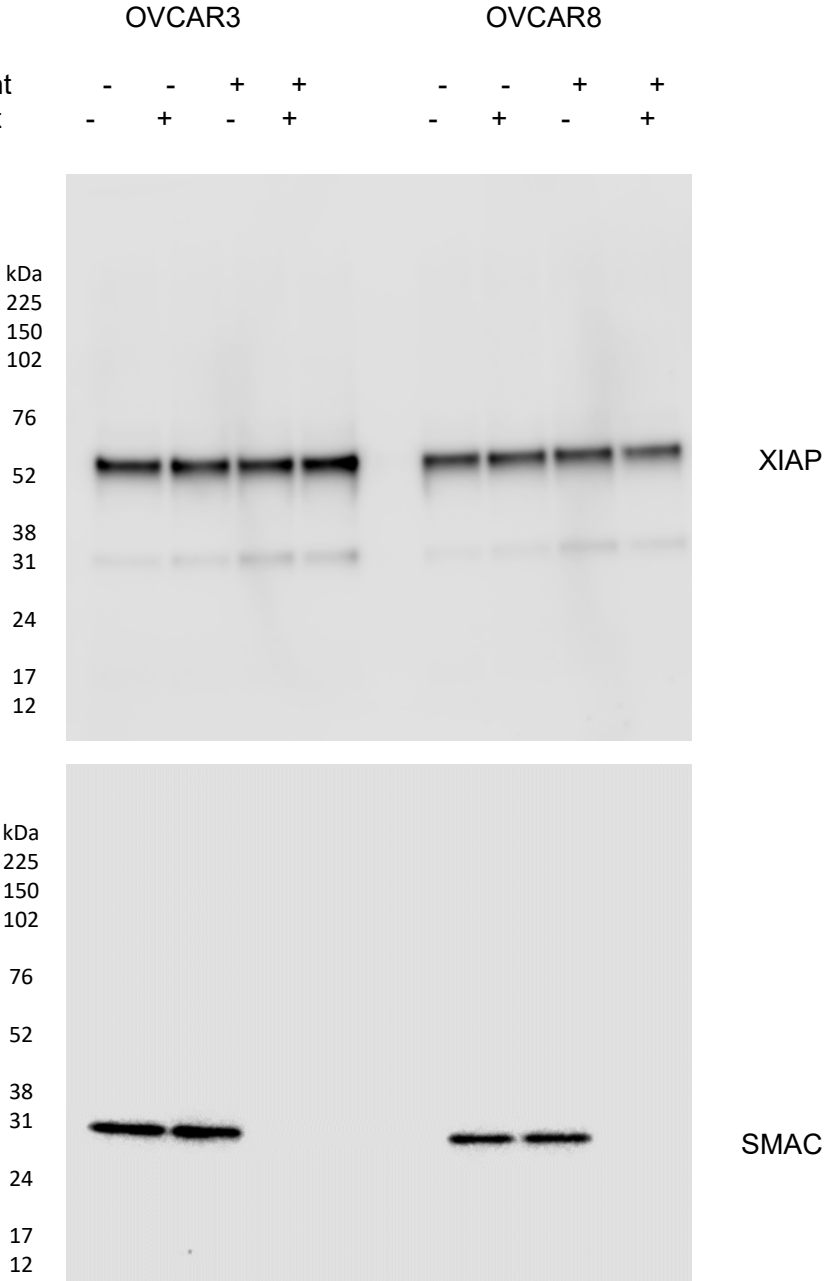

Supplemental Figure 7  
Figure 3D whole blot

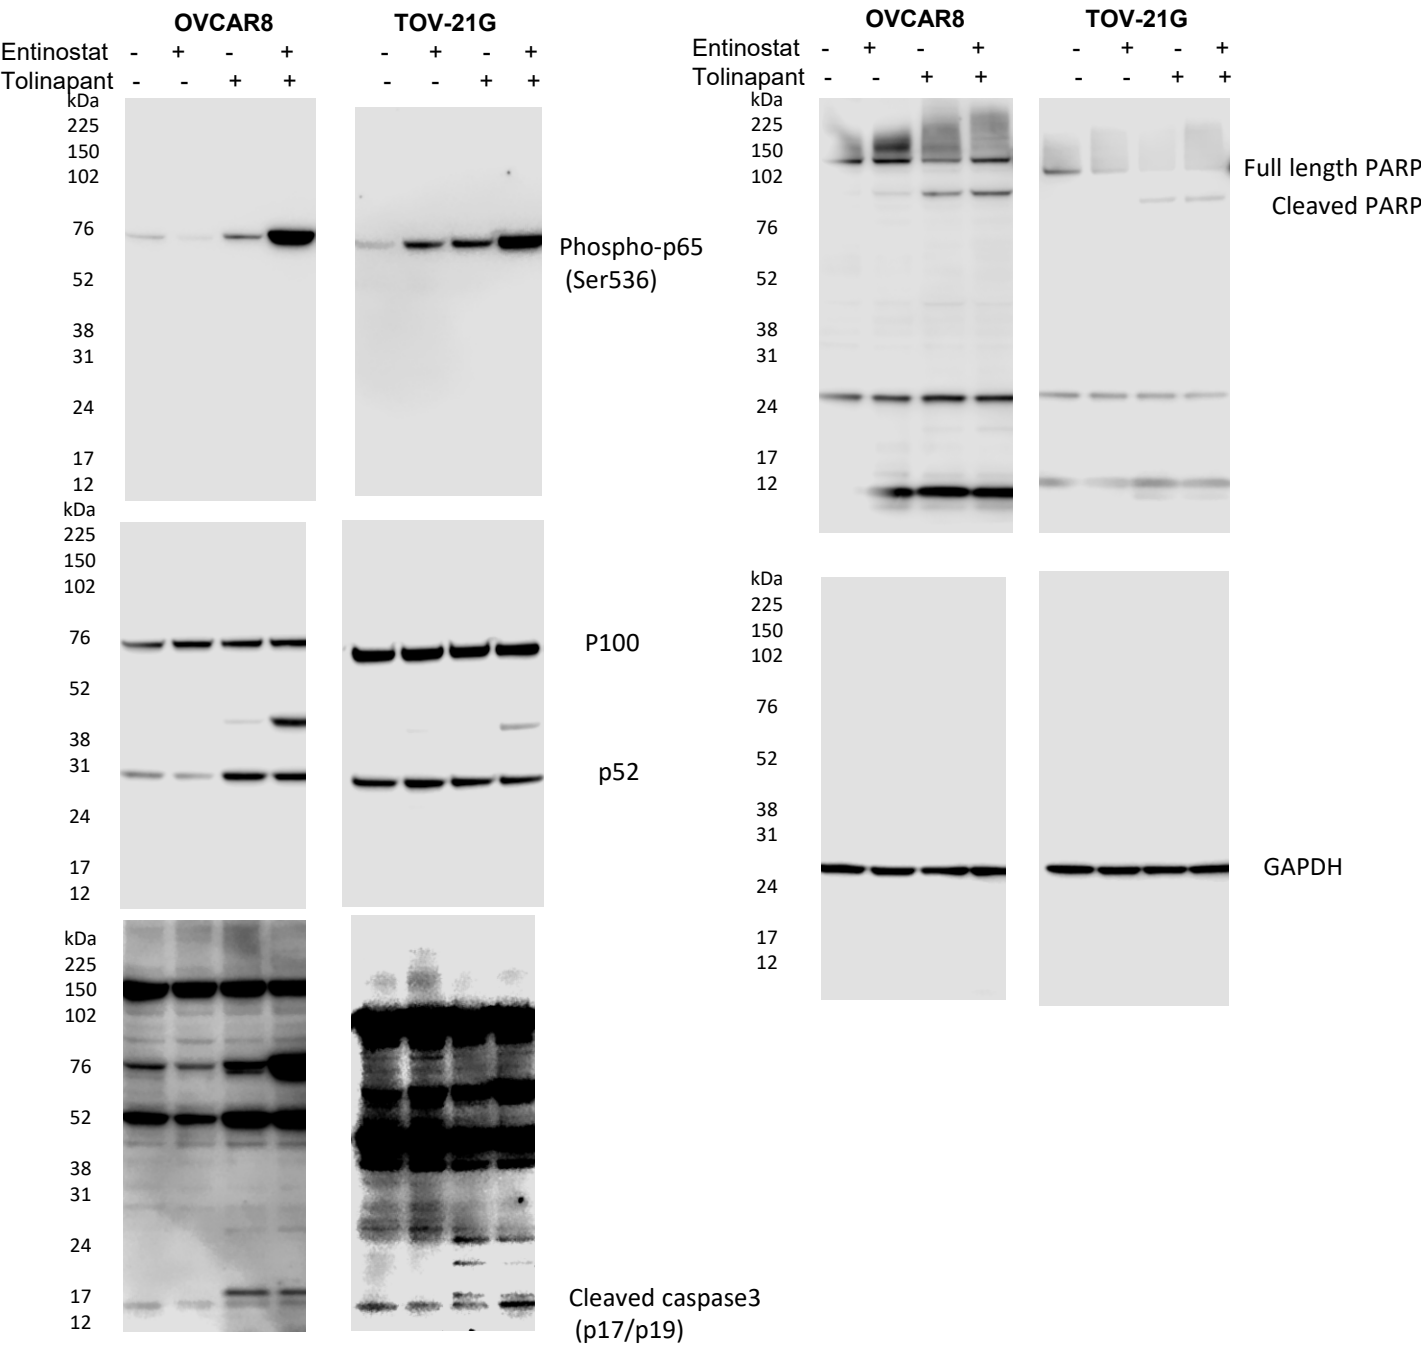

Supplement: s1 [file s1]
